# Supplementary material for: Switching of selectivity from benzaldehyde to benzoic acid using MIL-100(V) as a heterogeneous catalyst in aerobic oxidation of benzyl alcohol
Source: Royal Society of Chemistry journal article supplement (doi:10.1039/d4cy00832d), 2024-01-01
Supplement: d4cy00832d1.pdf [file d4cy00832d1.pdf]

**Switching of selectivity from benzaldehyde to benzoic acid using MIL-100(V) as  
a heterogeneous catalyst in aerobic oxidation of benzyl alcohol**

Duygu Haciefendiođlu<sup>1,2</sup>, Ali Tuncel<sup>1,\*</sup>

<sup>1</sup>Hacettepe University, Chemical Engineering Department, Ankara/Turkey

<sup>2</sup>Hacettepe University, Graduate School of Science and Engineering, Chemical  
Engineering Department, Ankara/Turkey

\*: Corresponding author: Dr. Ali Tuncel ([atuncel@hacettepe.edu.tr](mailto:atuncel@hacettepe.edu.tr))

**Supporting Information**

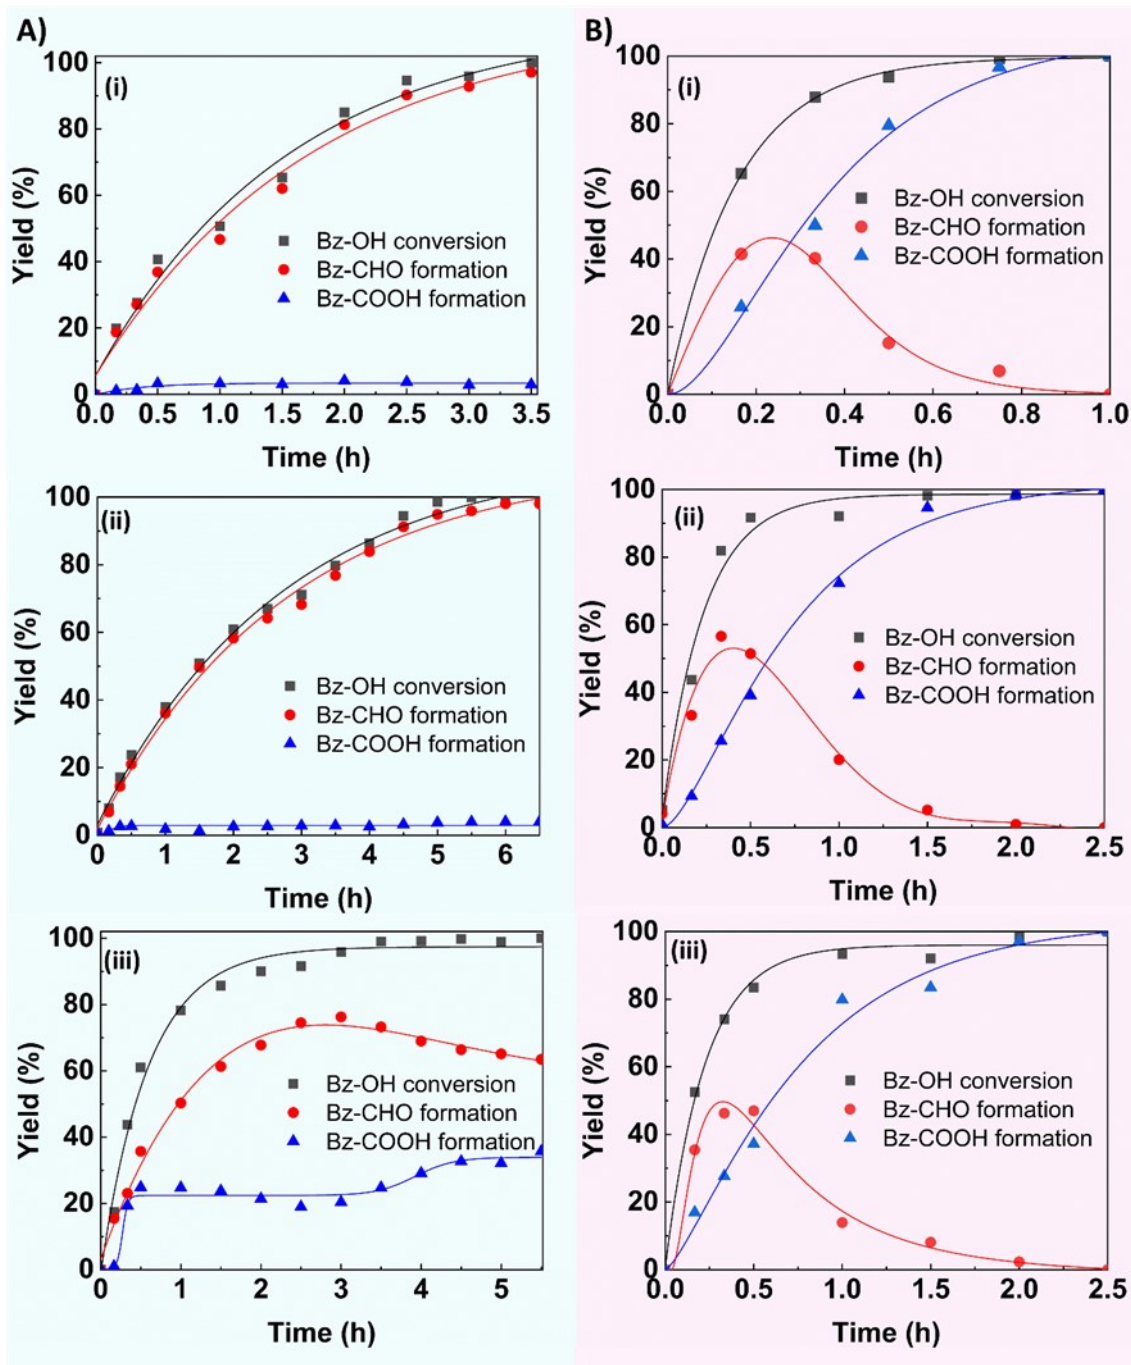

**Figure S1.** The variation of Bz-CHO and Bz-COOH formations with the time in the Bz-OH oxidations performed by changing initial Bz-OH concentration at 80°C and 120°C, using molecular oxygen as the oxidant. (A) Bz-CHO and Bz-COOH formation profiles at 80°C, Bz-OH concentration (mM): (i) 48.1, (ii) 96.2, (iii) 192.4, (B) Bz-CHO and Bz-COOH formation profiles at 120°C, Bz-OH concentration (mM): (i) 48.1, (ii) 96.2, (iii) 192.4, Common conditions: DEGDME: 2.5 mL, O<sub>2</sub> flow rate: 0.015 L/min, MIL-100(V) concentration for the runs performed at 80°C: 32 mg/mL, MIL-100(V) concentration for the runs performed at 120°C: 8 mg/mL.

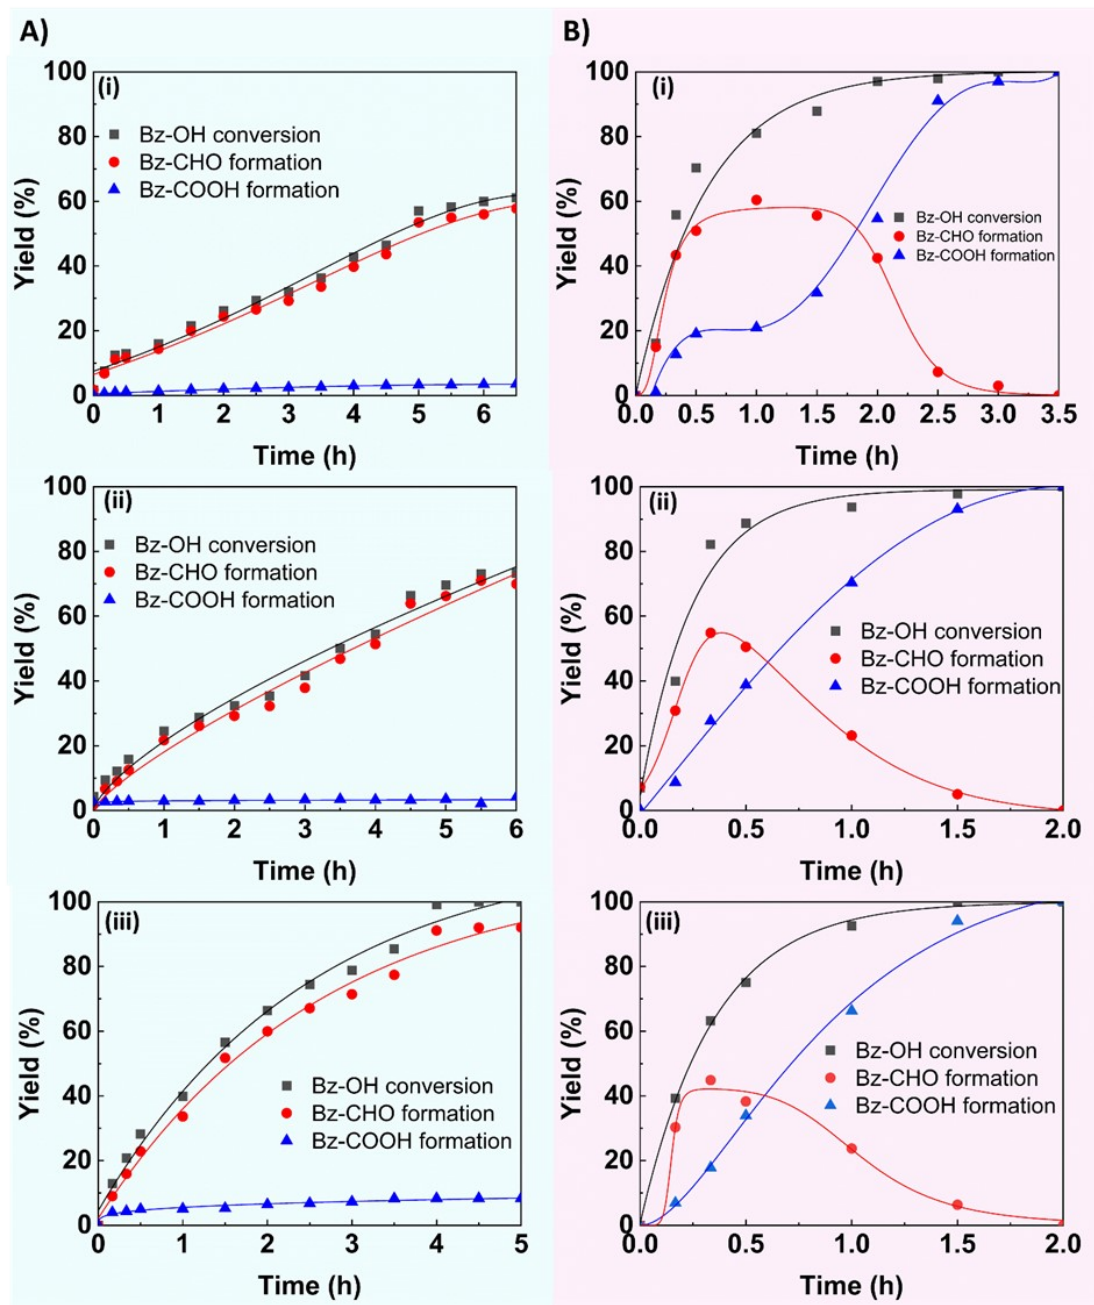

**Figure S2.** The variation of Bz-CHO and Bz-COOH formations with the time in the Bz-OH oxidations performed by changing air flow rate at 80°C and 120°C. (A) Bz-CHO and Bz-COOH formation profiles at 80°C, Air flow rate (L/min): (i) 0.05, (ii) 0.075, (iii) 0.150, (B) Bz-CHO and Bz-COOH formation profiles at 120°C, Air flow rate (L/min): (i) 0.05, (ii) 0.075, (iii) 0.150, Common conditions: DEGDME: 2.5 mL, MIL-100(V) concentration for the runs performed at 80°C: 32 mg/mL, MIL-100(V) concentration for the runs performed at 120°C: 8 mg/mL.

**Table S1.** The comparison of TOF values obtained for this study with the those obtained with different catalysts synthesized for oxidation of benzyl alcohol.

| Catalyst                                                           | Oxidation agent               | Temperature | Catalyst/Bz-OH ratio (mol/mol) | TOF(h <sup>-1</sup> )     | Reference        |
|--------------------------------------------------------------------|-------------------------------|-------------|--------------------------------|---------------------------|------------------|
| Pd/CeO <sub>2</sub>                                                | O <sub>2</sub>                | 120°C       | 0.009                          | 350000 <sup>a,b,c</sup>   | S1               |
| PA-Na-1                                                            | O <sub>2</sub>                | 140°C       | 0.0001                         | 106200 <sup>a,b,c,d</sup> | S2               |
| In <sub>2</sub> O <sub>3</sub> @Pd/MCF-H <sub>2</sub>              | O <sub>2</sub>                | 110°C       | 0.03                           | 49400 <sup>a,c,d</sup>    | S3               |
| Au/Mg <sub>3</sub> Al-L                                            | O <sub>2</sub>                | 80°C        | 0.002                          | 2615 <sup>a,b,e</sup>     | S4               |
| Au/S1CNT                                                           | O <sub>2</sub>                | 50°C        | 0.002                          | 2294 <sup>a,b,e</sup>     | S5               |
| Pd/CeO <sub>2</sub> -R                                             | O <sub>2</sub>                | 90°C        | 0.0002                         | 1290 <sup>c</sup>         | S6               |
| Au <sub>x</sub> Pd <sub>y</sub> /CNT                               | O <sub>2</sub>                | 80°C        | 0.007                          | 1274 <sup>a,b</sup>       | S7               |
| Pd-IL-HNTs                                                         | H <sub>2</sub> O <sub>2</sub> | 70°C        | 20 mg/2.88mmol                 | 118.1 <sup>a,b</sup>      | S8               |
| Pt/5MnNS                                                           | O <sub>2</sub>                | 25°C        | 0.09                           | 1.8 <sup>a</sup>          | S9               |
| SO <sub>4</sub> <sup>-2</sup> /Zr-OMC                              | TBHP                          | 90°C        | 0.099                          | 34668 <sup>a,b,d</sup>    | S10              |
| Fe <sub>5A</sub> /MoS <sub>2</sub>                                 | O <sub>2</sub>                | 120 °C      | 0.001                          | 2105 <sup>f</sup>         | S11              |
| Cu <sub>x</sub> O <sub>y</sub> @PCNs-H <sub>2</sub> O <sub>2</sub> | TBHP                          | 80°C        | 0.018                          | 535.5 <sup>a,b</sup>      | S12              |
| [{VO(OEt)(EtOH)} <sub>2</sub> (L <sub>2</sub> )]                   | TBHP                          | RT          | 0.002                          | 389 <sup>f</sup>          | S13              |
| AuSn/rGO-CoIM                                                      | O <sub>2</sub>                | 100°C       | 0.018                          | 103.6 <sup>a,e</sup>      | S14              |
| MOF-BASU1                                                          | TBHP                          | 80°C        | 0.008                          | 77.6 <sup>f</sup>         | S15              |
| [Mn(bipy) <sub>2</sub> ] <sup>2+</sup> +HMS                        | TBHP                          | 90 °C       | 0.0013                         | 21.28 <sup>f</sup>        | S16              |
| Im-Tpy@Co                                                          | Air                           | RT          | 0.2                            | 34.17 <sup>f</sup>        | S17              |
| Co@NC                                                              | O <sub>2</sub>                | 60°C        | 0.046                          | 15.6 <sup>f</sup>         | S18              |
| VO <sub>x</sub> @SiO <sub>2</sub>                                  | PMS                           | 25°C        | 0.025                          | 0.075 <sup>a,d</sup>      | S19              |
| MIL-100(V)                                                         | O <sub>2</sub>                | 120°C       | 0.001                          | 497 <sup>f</sup>          | <b>This work</b> |
| MIL-100(V)                                                         | O <sub>2</sub>                | 80°C        | 0.006                          | 68.3 <sup>f</sup>         | <b>This work</b> |

a: Based on Bz-OH conversion, b: Based on metal surface dispersion, c: Based on only Pd, d: Calculated from the data reported in the reference, e: Based on only Au, f: TOF=  $n_{\text{Main product}} / (n_{\text{vanadium}} \times t_{\text{reaction}})$  where  $n_{\text{Main product}}$  is the mole of main product,  $n_{\text{vanadium}}$ : mole of vanadium in MIL-100 (V),  $t_{\text{reaction}}$ : is the reaction period for obtaining 80 % of Bz-OH conversion.

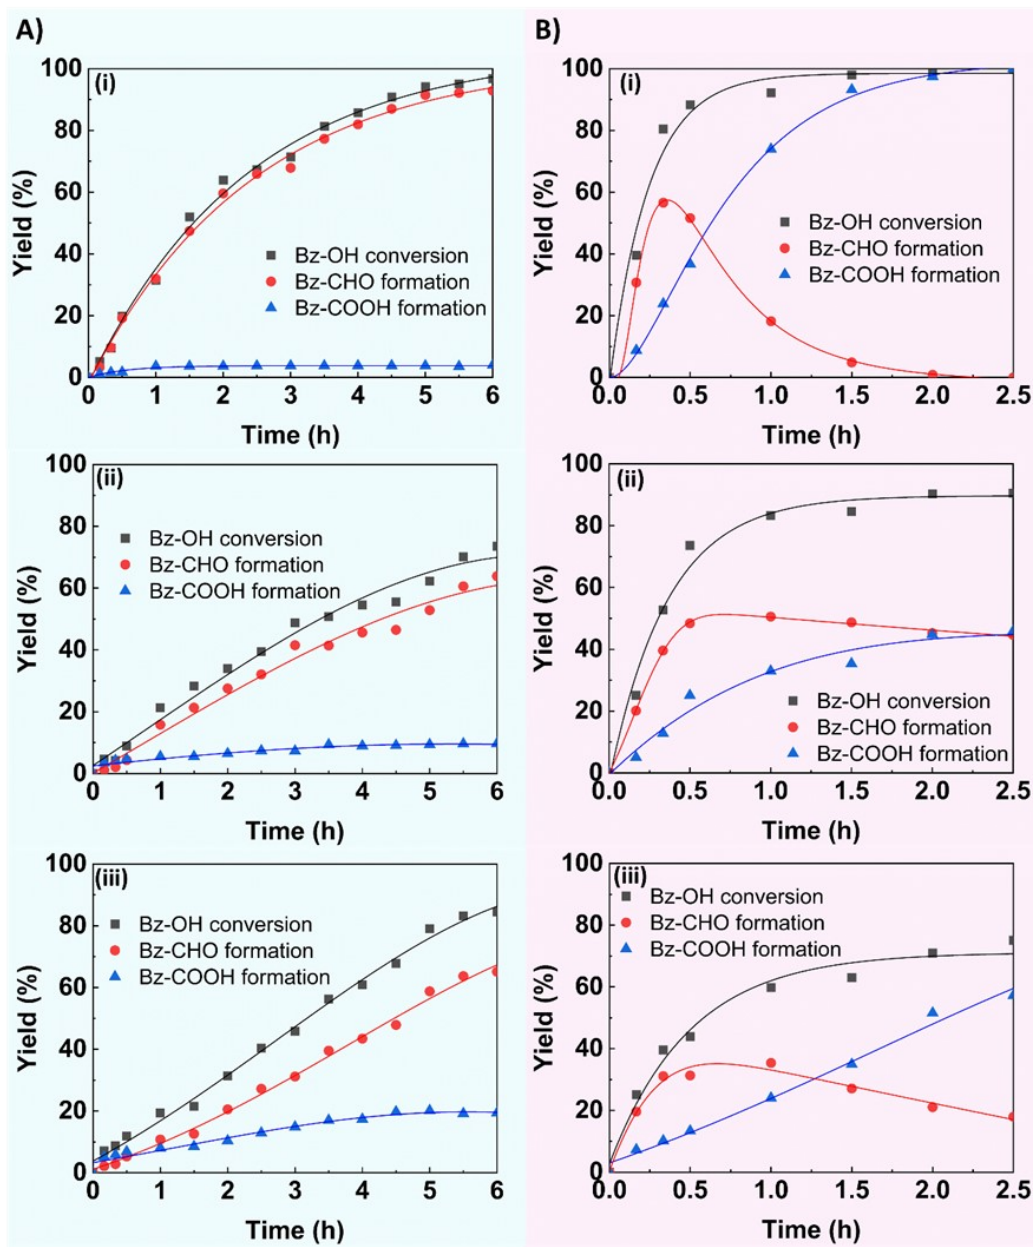

**Figure S3.** The variation of Bz-CHO and Bz-COOH formations with the time in the Bz-OH oxidations performed using different radical scavengers at two different reaction temperatures. Temperature and type of radical scavenging agent: (A) Bz-CHO and Bz-COOH formation profiles at 80°C, Scavenger type: (i) L-AA, (ii) IPA, (iii) NaN<sub>3</sub>, (B) Bz-CHO and Bz-COOH formation profiles at 120°C, Scavenger type: (i) L-AA, (ii) IPA, (iii) NaN<sub>3</sub>, Common conditions: Bz-OH initial concentration: 98.2 mM, O<sub>2</sub> flow rate: 0.015 L/min, DEGDME: 2.5 mL, MIL-100(V) concentration for the runs performed at 80°C: 32 mg/mL, MIL-100(V) concentration for the runs performed at 120°C: 8 mg/mL.



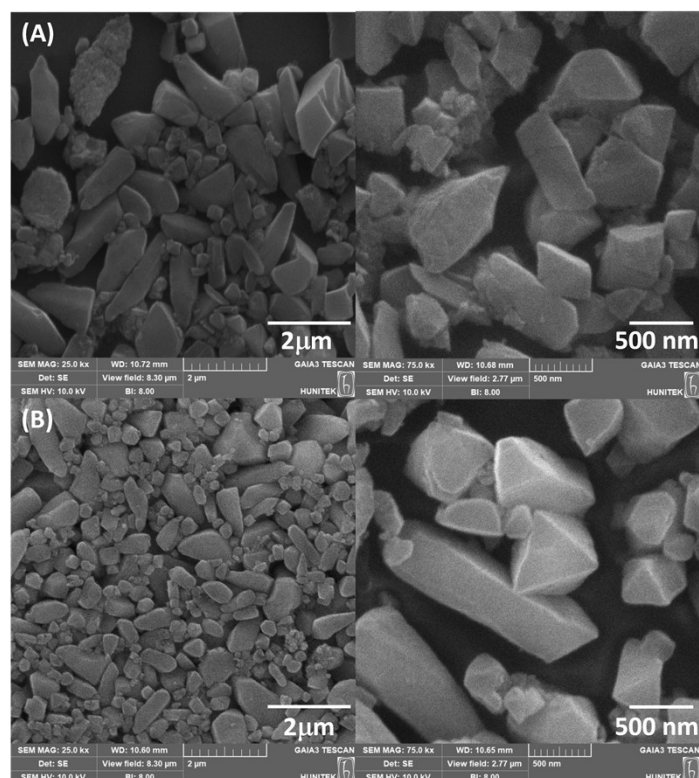

**Figure S4.** The SEM photographs of MIL-100(V) (A) after using five consecutive Bz-OH oxidation runs at 80°C, (B) after using five consecutive Bz-OH oxidation runs at 120°C. Common conditions: Bz-OH initial concentration: 98.2 mM, O<sub>2</sub> flow rate: 0.015 L/min, DEGDME: 2.5 mL, MIL-100(V) concentration for the runs performed at 80°C: 32 mg/mL, MIL-100(V) concentration for the runs performed at 120°C: 8 mg/mL.

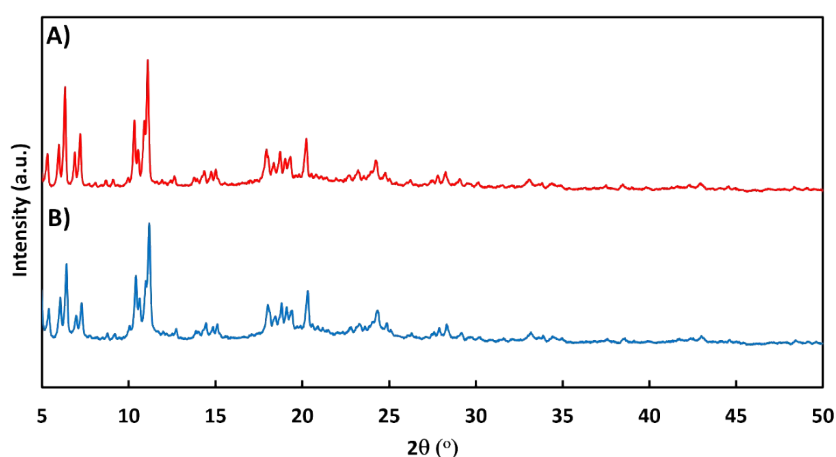

**Figure S5.** X-ray diffraction spectra of MIL-100(V) after using five consecutive Bz-OH oxidation runs performed at (A) 80°C and (B) 120°C. The reaction conditions are given in **Figure S4**.

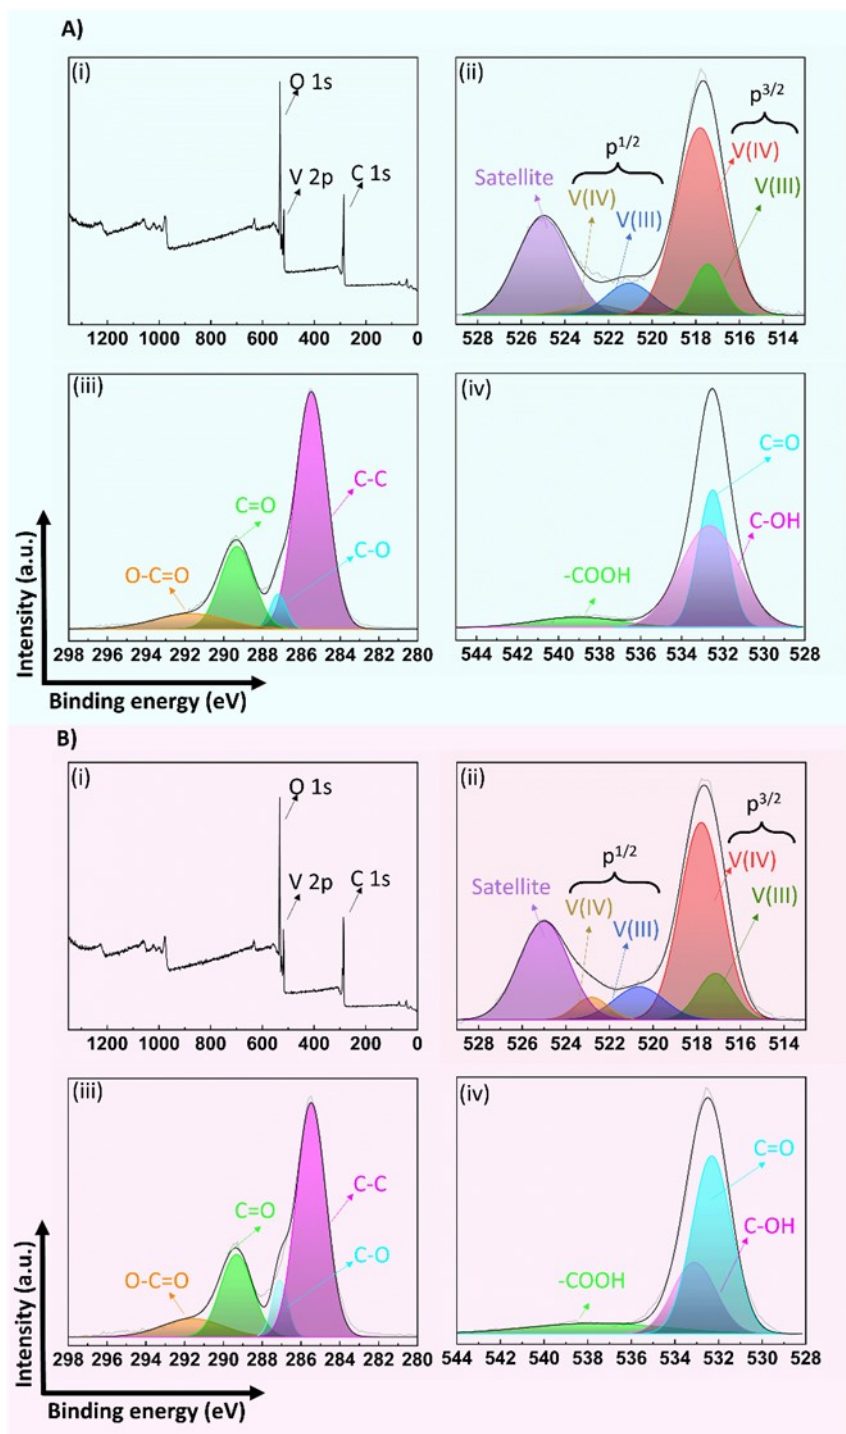

**Figure S6.** X-ray photoelectron spectroscopy of MIL-100(V) after using five consecutive Bz-OH oxidation runs at 80°C. (A): (i) Survey XPS spectrum, Core level spectra for (ii) V 2p scan, (iii) C 1s scan, (iv) O 1s scan. Bz-OH oxidation conditions are given in Figure 9. X-ray photoelectron spectroscopy of MIL-100(V) after using five consecutive Bz-OH oxidation runs at 120°C. (B): (i) Survey XPS spectrum, Core level spectra for (ii) V 2p scan, (iii) C 1s scan, (iv) O 1s scan. The reaction conditions are given in **Figure S4**.

## References

- [S1] Z. Wang, B. Zhang, S. Yang, X. Yang, F. Meng, L. Zhai, Z. Li, S. Zhao, G. Zhang, Y. Qin, Dual Pd<sup>2+</sup> and Pd<sup>0</sup> sites on CeO<sub>2</sub> for benzyl alcohol selective oxidation, *J. Catal.* 414 (2022) 385-393. <https://doi.org/10.1016/j.jcat.2022.09.012>.
- [S2] H. Yuan, Q. Li, Z. Liu, Q. Qi, C. Wan, X. Yin, X. Yang, Y. Ding, Z. Du, Solvent-free efficient oxidation of benzyl alcohol on nano-Pd/Al<sub>2</sub>O<sub>3</sub>: Effect of palladium source and pH value, *Appl. Catal. A* 654 (2023) 119070. <https://doi.org/10.1016/j.apcata.2023.119070>.
- [S3] P. Bai, Z. Zhao, Y. Zhang, Z. He, Y. Liu, C. Wang, S. Ma, P. Wu, L. Zhao, S. Mintova, Z. Yan, rational design of highly efficient PdIn–In<sub>2</sub>O<sub>3</sub> interfaces by a capture-alloying strategy for benzyl alcohol partial oxidation, *ACS Appl. Mater. Interfaces* 15 (2023) 19653-19664. <https://doi.org/10.1021/acsami.3c00810>.
- [S4] J. Luo, S. Yang, Y. Ling, W. Yang, H. Niu, W. Li, H. Liu, C. Liang, Defective Au nanoparticles manipulated by Au-MgAl-LDH interplay for alkali-free oxidation of benzyl alcohol, *J. Chem. Eng.* 473 (2023) 145171. <https://doi.org/10.1016/j.cej.2023.145171>.
- [S5] J. Luo, Y. Dong, S. Yang, F. Shan, Q. Jiang, Y. Ma, C. Liang, Au nanoparticles anchored on sulfonated carbon nanotubes for benzyl alcohol oxidation, *ACS Appl. Nano Mater.* 4 (2022) 4887-4895. <https://doi.org/10.1021/acsanm.1c04453>.
- [S6] L. Zhang, R. Chen, Y. Tu, X. Gong, X. Cao, Q. Xu, Y. Li, B. Ye, Y. Ye, J. Zhu, Revealing the crystal facet effect of ceria in Pd/CeO<sub>2</sub> catalysts toward the selective oxidation of benzyl alcohol, *ACS Catal.* 13 (2023) 2202-2213. <https://doi.org/10.1021/acscatal.2c04252>.
- [S7] J. Luo, Y. Zhou, S. Yang, W. Zhu, S. Li, C. Liang, structural construction of Au–Pd nanocomposite for alkali-free oxidation of benzyl alcohol, *ACS Appl. Mater. Interfaces* 15 (2023) 22025-22035. <https://doi.org/10.1021/acsami.3c00163>.
- [S8] J. Wang, Y. Zhang, Y. Xu, P. Zhang, Q. Gao, Q. Liang, W. Zhang, W. Li, R. Guo, B. Jin, S. Miao, Halloysite-based nanomotors with embedded palladium nanoparticles for



selective benzyl alcohol oxidation, *ACS Appl. Nano Mater.* 5 (2022) 12806-12816. <https://doi.org/10.1021/acsanm.2c02686>.

[S9] Y Shi, M. Shen, Z. Wang, C. Liu, J. Bi, L. Wu, Visible-light-driven benzyl alcohol oxidation over Pt/Mn-Bi<sub>4</sub>Ti<sub>3</sub>O<sub>12</sub> nanosheets: Structure-function relationship of multicomponent photocatalysts, *J. Catal.* 418 (2023) 141-150. <https://doi.org/10.1016/j.jcat.2023.01.015>.

[S10] A. Ramesh, R. Manigandan, B. M. Ali, K. Dhandapani, C. T. Da, M.T.N. Le, Selective oxidation of benzyl alcohol over sulphated zirconia incorporated ordered mesoporous carbon by a hard template method, *J. Alloys Compd.* 918 (2022) 165729. <https://doi.org/10.1016/j.jallcom.2022.165729>.

[S11] Z. Li, H. Li, Z. Yang, X. Lu, S. Ji, M. Zhang, J. H. Horton, H. Ding, Q. Xu, J. Zhu, J. Yu, Facile synthesis of single iron atoms over MoS<sub>2</sub> nanosheets via spontaneous reduction for highly efficient selective oxidation of alcohols, *Small*, 18 (2022) 2201092. <https://doi.org/10.1002/smll.202201092>.

[S12] J. Liu, H. Yang, U. I. Kara, E. Boerner, Y. Luo, H. Yu, Y. Xu, X. Wang, K. Huang, A facile synthesis of stable copper-based core-shell catalysts for highly efficient 4-nitrophenol reduction and benzyl alcohol oxidation, *J. Chem. Eng.* 479 (2024) 147778. <https://doi.org/10.1016/j.cej.2023.147778>.

[S13] M. Sutradhar, M. G. Martins, D.H.B.G.O.R. Simões, R. M.N. Serôdio, H. M. Lapa, E.C.B.A. Alegria, M.F. C. G. da Silva, A. J.L. Pombeiro, Ultrasound and photo-assisted oxidation of toluene and benzyl alcohol with oxidovanadium(V) complexes, *Appl. Catal. A.* 638 (2022) 118623. <https://doi.org/10.1016/j.apcata.2022.118623>.

[S14] L. Liu, X. Zhou, C. Xin, B. Zhang, G. Zhang, S. Li, L. Liu, X. Tai, Efficient oxidation of benzyl alcohol into benzaldehyde catalyzed by graphene oxide and reduced graphene oxide supported bimetallic Au–Sn catalysts, *RSC Adv.* 13 (2023) 23648-23658. <https://doi.org/10.1039/D3RA03496H>.

[S15] M. Yaghubzadeh, S. Alavinia, R. G. Vaghei, A sustainable protocol for selective alcohols oxidation using a novel iron-based metal organic framework (MOF-BASU1), RSC Adv. 13 (2023) 24639-24648. <https://doi.org/10.1039/d3ra03058j>.

[S16] V. Mahdavi, M. Mardani, Selective oxidation of benzyl alcohol with tert-butylhydroperoxide catalysed via Mn (II) 2, 2-bipyridine complexes immobilized over the mesoporous hexagonal molecular sieves (HMS), J. Chem. Sci. 124 (2012) 1107-1115. <https://doi.org/10.1007/s12039-012-0307-4>.

[S17] S. Kumar, M. Kumar, V. Bhalla, Cobalt-centered supramolecular nanoensemble for regulated aerobic oxidation of alcohols and “one-pot” synthesis of quinazolin-4(3h)-ones, ACS Appl. Mater. Interfaces, 15 (2023) 49246-49258. <https://doi.org/10.1021/acsami.3c11244>.

[S18] Q. Hao, Z. Li, Y. Shi, R. Li, Y. Li, L. Wang, H. Yuan, S. Ouyang, T. Zhang, Plasmon-induced radical-radical heterocoupling boosts photodriven oxidative esterification of benzyl alcohol over nitrogen-doped carbon-encapsulated cobalt nanoparticles, Angew. Chem. Int. Ed. 62 (2023) e202312808. [doi.org/10.1002/anie.202312808](https://doi.org/10.1002/anie.202312808).

[S19] Y. Wu, L.H. Kong, W.T. Ge, W.J. Zhang, Z.Y. Dong, X.J. Guo, X. Yan, Y. Chen, W.Z. Lang, A porous V/SiO<sub>2</sub> sphere composite for the selective oxidation of benzyl alcohol to benzaldehyde in aqueous phase through peroxymonosulfate activation, J. Catal, 413 (2022) 668-680. <https://doi.org/10.1016/j.jcat.2022.07.011>.
